# Supplementary figures and images for: Rapid Indentification of Auramine O Dyeing Adulteration in Dendrobium officinale, Saffron and Curcuma by SERS Raman Spectroscopy Combined with SSA-BP Neural Networks Model
Source: MDPI journal article supplement (doi:10.3390/foods12224124), 2023-11-14

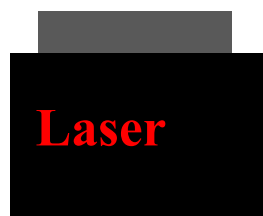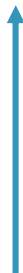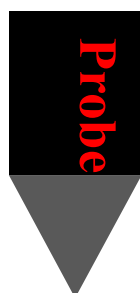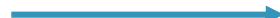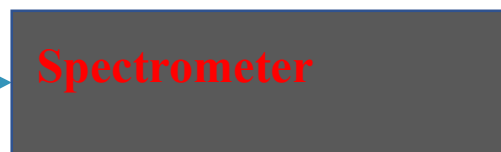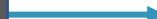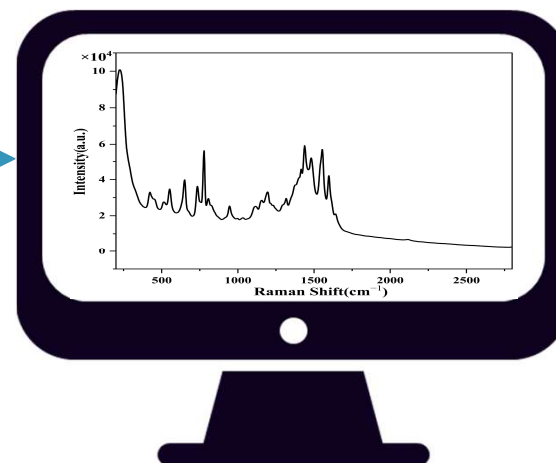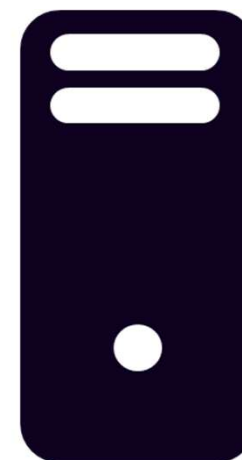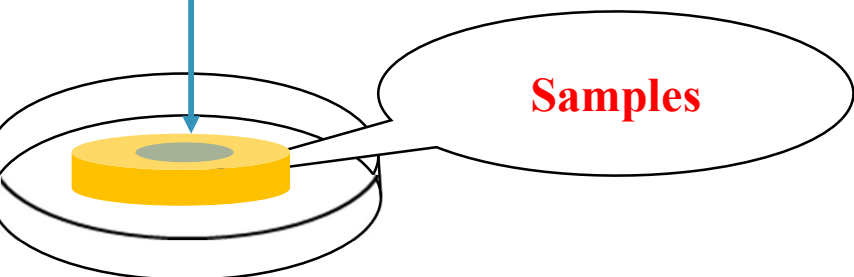

Samples

Supplement: s1 [file s1]
